# Supplementary material for: Ultralong cylindrical micelles precisely located with semiconductor nanorods by solvent evaporation-driven self-assembly
Source: Royal Society of Chemistry journal article supplement (doi:10.1039/c4sm01353k), 2014-08-01
Supplement: c4sm01353k1.pdf [file c4sm01353k1.pdf]

*Supporting Information for:*

# Ultralong cylindrical micelles precisely located with semiconductor nanorods by solvent evaporation-driven self-assembly

**Xiaobo Nie<sup>a,b</sup>, Jie Cui<sup>a</sup> and Wei Jiang<sup>\*a</sup>**

<sup>a</sup> State Key Laboratory of Polymer Physics and Chemistry, Changchun Institute of Applied Chemistry, Chinese Academy of Sciences, Changchun 130022, P. R. China

<sup>b</sup> University of Chinese Academy of Sciences, Beijing 100049, P. R. China

\* Corresponding author. E-mail: wjiang@ciac.ac.cn

## SUPPORTING DATA

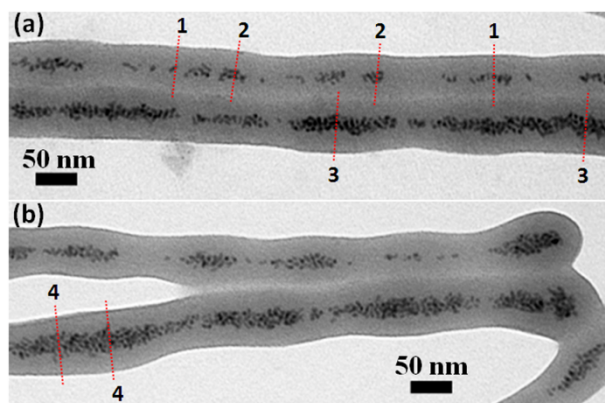

**Fig. S1** (a) and (b) Bright-field TEM images showing the numbers of the PS-NRs randomly oriented in the central portions of the hybrid cylinders in the corresponding cross-sections. The red dash lines meant the cross-sections of the hybrid cylinders and the numbers nearby were the amounts of the PS-NRs in the corresponding cross-sections.

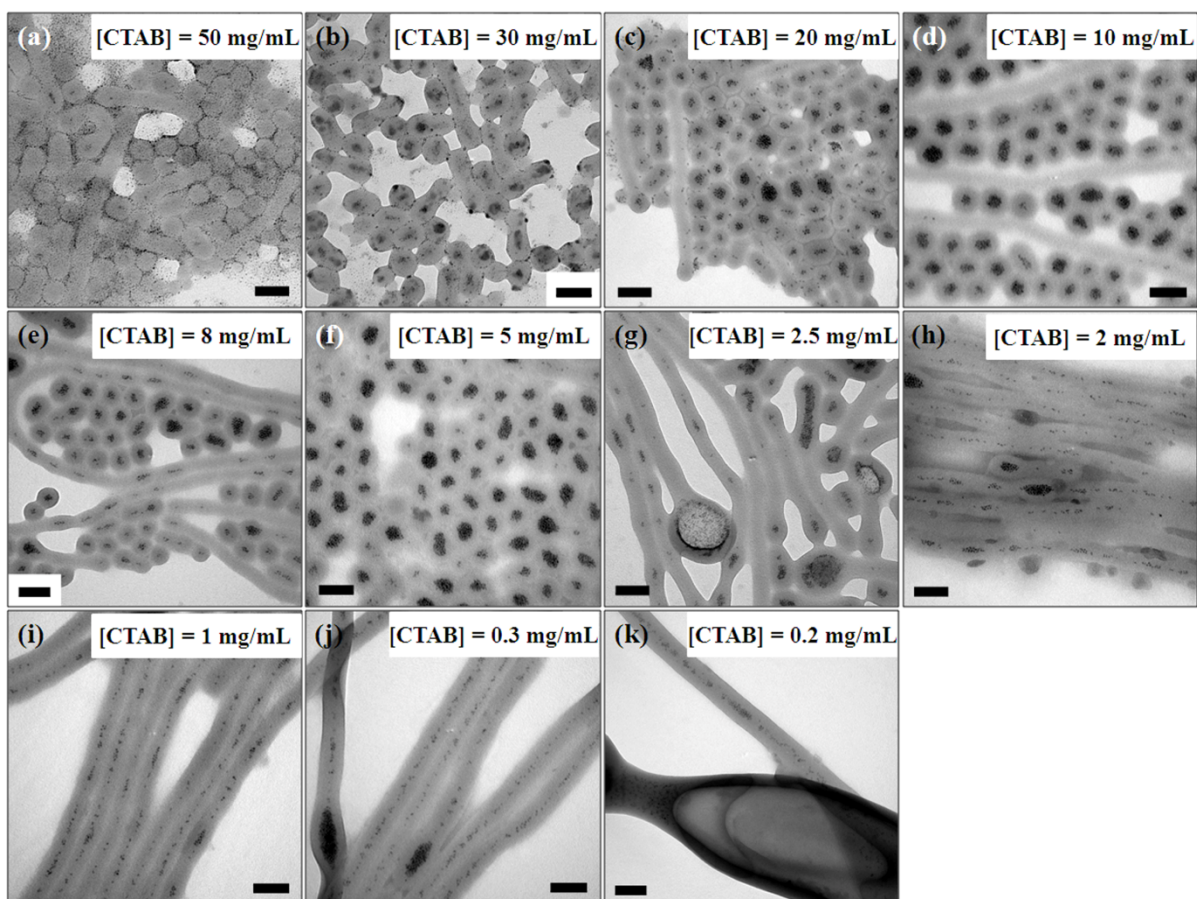

**Fig. S2** (a-k) Bright-field TEM images of coassemblies formed from PS-NRs ( $f = 0.1$ ) and PS<sub>356</sub>-*b*-PEO<sub>148</sub> in CHCl<sub>3</sub>-in-H<sub>2</sub>O emulsions ( $V_{\text{CHCl}_3}:V_{\text{H}_2\text{O}} = 1:5$ ) at magnetic stirring rate of 750 rpm, but varied [CTAB] as depicted in the top right corner of the corresponding image: (a) 50 mg/mL; (b) 30 mg/mL; (c) 20 mg/mL; (d) 10 mg/mL; (e) 8 mg/mL; (f) 5 mg/mL; (g) 2.5 mg/mL; (h) 2 mg/mL; (i) 1 mg/mL; (j) 0.3 mg/mL; (k) 0.2 mg/mL. All scale bars in the TEM images are 100 nm.

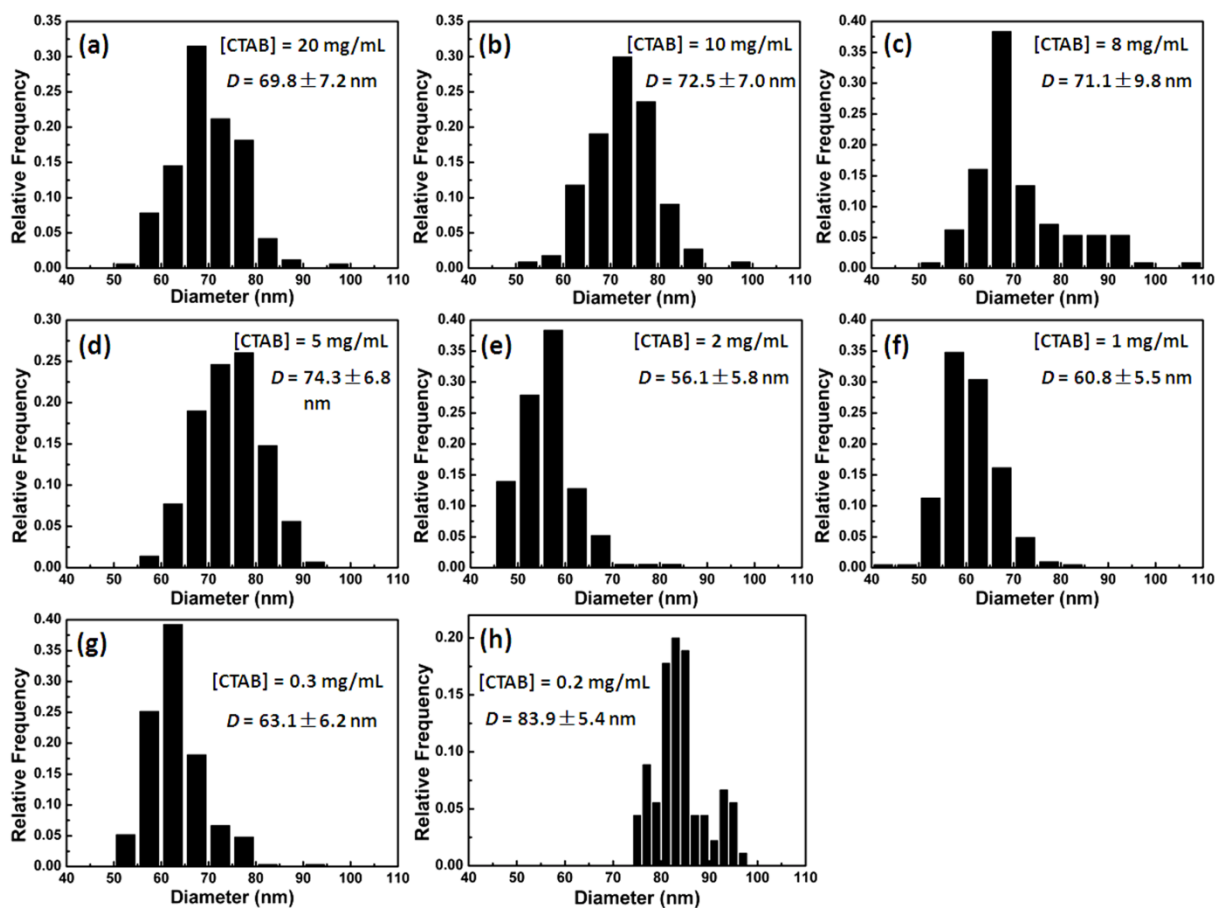

**Fig. S3** Distributions of the statistic diameters of the coassemblies formed from PS-NRs ( $f = 0.1$ ) and PS<sub>356</sub>-*b*-PEO<sub>148</sub> in CHCl<sub>3</sub>-in-H<sub>2</sub>O emulsions ( $V_{\text{CHCl}_3}:V_{\text{H}_2\text{O}} = 1:5$ ) at magnetic stirring rate of 750 rpm, but varied [CTAB]: (a) [CTAB] = 20 mg/mL,  $D = 69.8 \pm 7.2$  nm; (b) [CTAB] = 10 mg/mL,  $D = 72.5 \pm 7.0$  nm; (c) [CTAB] = 8 mg/mL,  $D = 71.1 \pm 9.8$  nm; (d) [CTAB] = 5 mg/mL,  $D = 74.3 \pm 6.8$  nm; (e) [CTAB] = 2 mg/mL,  $D = 56.1 \pm 5.8$  nm; (f) [CTAB] = 1 mg/mL,  $D = 60.8 \pm 5.5$  nm; (g) [CTAB] = 0.3 mg/mL,  $D = 63.1 \pm 6.2$  nm; (h) [CTAB] = 0.2 mg/mL,  $D = 83.9 \pm 5.4$  nm.

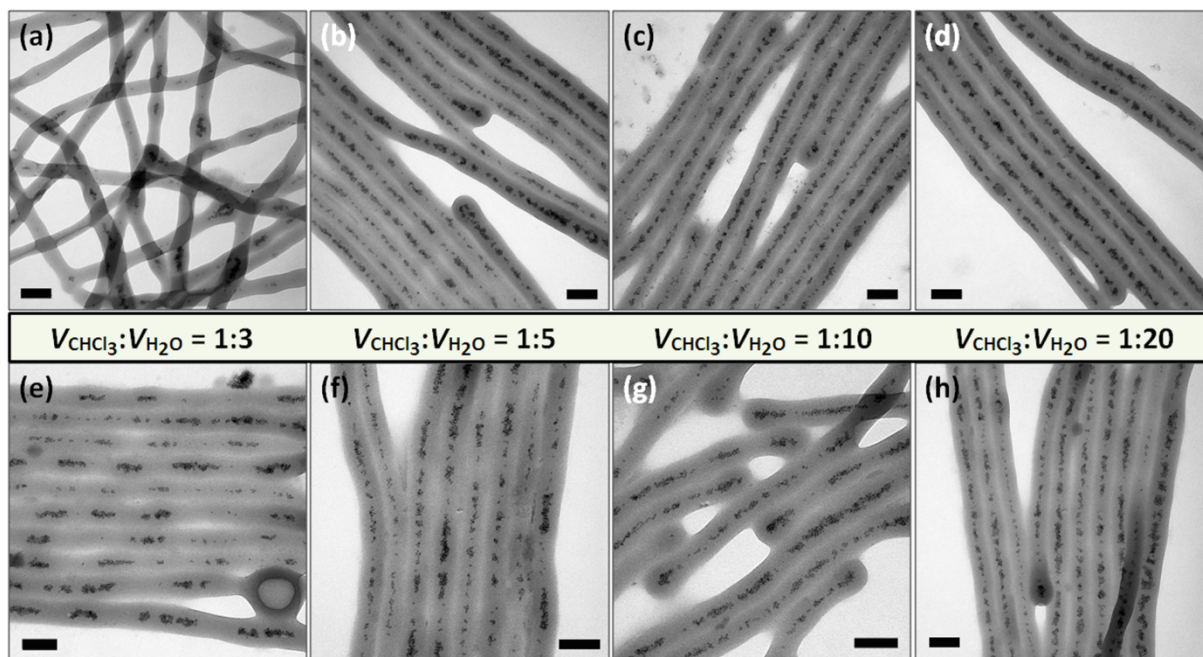

**Fig. S4** (a-h) Bright-field TEM images of cylindrical micelles with PS-NRs loaded in their central cores formed from PS-NRs ( $f = 0.1$ ) and PS<sub>356</sub>-*b*-PEO<sub>148</sub> in CHCl<sub>3</sub>-in-H<sub>2</sub>O emulsions at different  $V_{\text{CHCl}_3}:V_{\text{H}_2\text{O}}$  when [CTAB] = 1 mg/mL and magnetic stirring rate was 750 rpm. (a-d)  $V_{\text{CHCl}_3} = 0.2$  mL, but varied  $V_{\text{H}_2\text{O}}$ ; (e-h)  $V_{\text{H}_2\text{O}} = 1$  mL, but varied  $V_{\text{CHCl}_3}$ . The  $V_{\text{CHCl}_3}:V_{\text{H}_2\text{O}}$  was set to be (a, e) 1:3, (b, f) 1:5, (c, g) 1:10 and (d, h) 1:20, respectively. All scale bars in the TEM images are 100 nm.

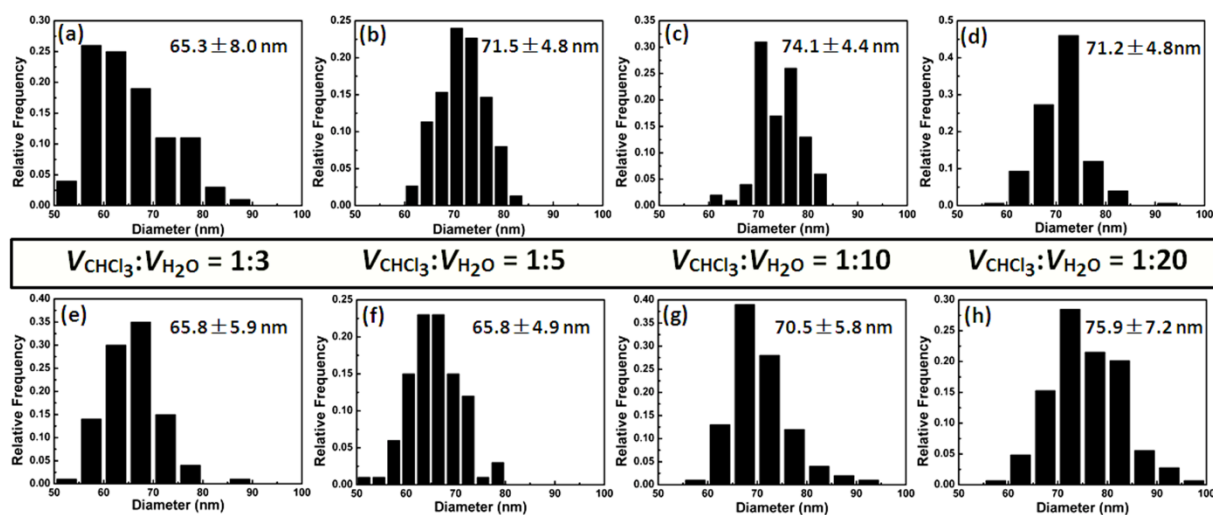

**Fig. S5** (a-h) Distributions of the statistic diameters of the hybrid cylinders formed from PS-NRs ( $f = 0.1$ ) and PS<sub>356</sub>-*b*-PEO<sub>148</sub> in CHCl<sub>3</sub>-in-H<sub>2</sub>O emulsions at different  $V_{\text{CHCl}_3}:V_{\text{H}_2\text{O}}$  when [CTAB] = 1 mg/mL and magnetic stirring rate was 750 rpm. (a-d)  $V_{\text{CHCl}_3} = 0.2$  mL, but varied  $V_{\text{H}_2\text{O}}$ ; (e-h)  $V_{\text{H}_2\text{O}} = 1$  mL, but varied  $V_{\text{CHCl}_3}$ . The  $V_{\text{CHCl}_3}:V_{\text{H}_2\text{O}}$  was set to be (a, e) 1:3, (b, f) 1:5, (c, g) 1:10 and (d, h) 1:20, respectively.

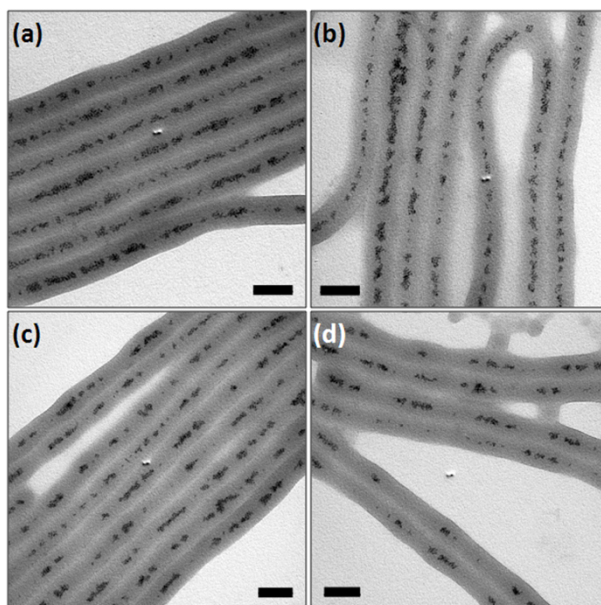

**Fig. S6** (a-d) Bright-field TEM images of cylindrical micelles with PS-NRs loaded in their central cores formed from PS-NRs ( $f = 0.1$ ) and PS<sub>356</sub>-*b*-PEO<sub>148</sub> in CHCl<sub>3</sub>-in-H<sub>2</sub>O emulsions ( $V_{\text{CHCl}_3}:V_{\text{H}_2\text{O}} = 1:5$ ) in the presence of CTAB ([CTAB] = 1 mg/mL) under different magnetic stirring rate: (a) 500 rpm; (b) 750 rpm; (c) 1000 rpm; (d) 1500 rpm. All scale bars in the TEM images are 100 nm.

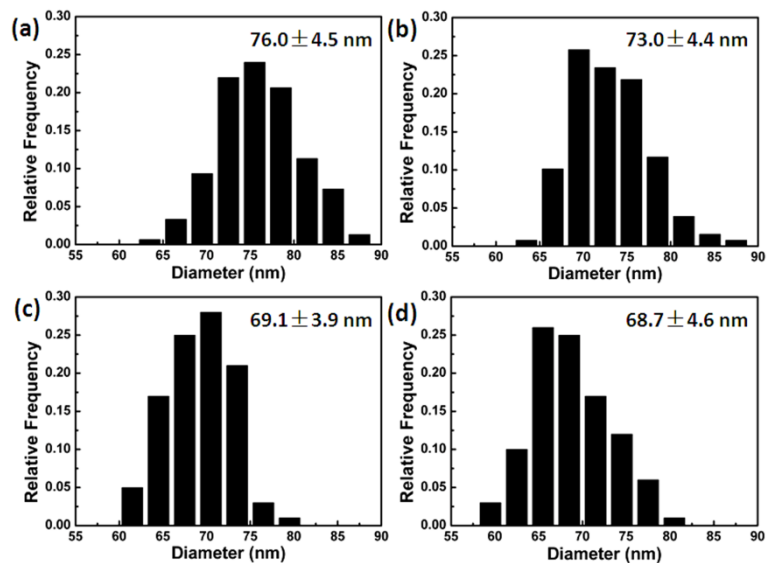

**Fig. S7** (a-d) Distributions of the statistic diameters of the hybrid cylinders formed from PS-NRs ( $f = 0.1$ ) and PS<sub>356</sub>-*b*-PEO<sub>148</sub> in CHCl<sub>3</sub>-in-H<sub>2</sub>O emulsions ( $V_{\text{CHCl}_3}:V_{\text{H}_2\text{O}} = 1:5$ ) in the presence of CTAB ([CTAB] = 1 mg/mL) under different magnetic stirring rate: (a) 500 rpm; (b) 750 rpm; (c) 1000 rpm; (d) 1500 rpm.
